# Supplementary material for: Comparative Pathogenesis, Genomics and Phylogeography of Mousepox
Source: MDPI journal article supplement (doi:10.3390/v13061146), 2021-06-15
Supplement: s1 [file s1]

## Supplementary data

**Figure S1**

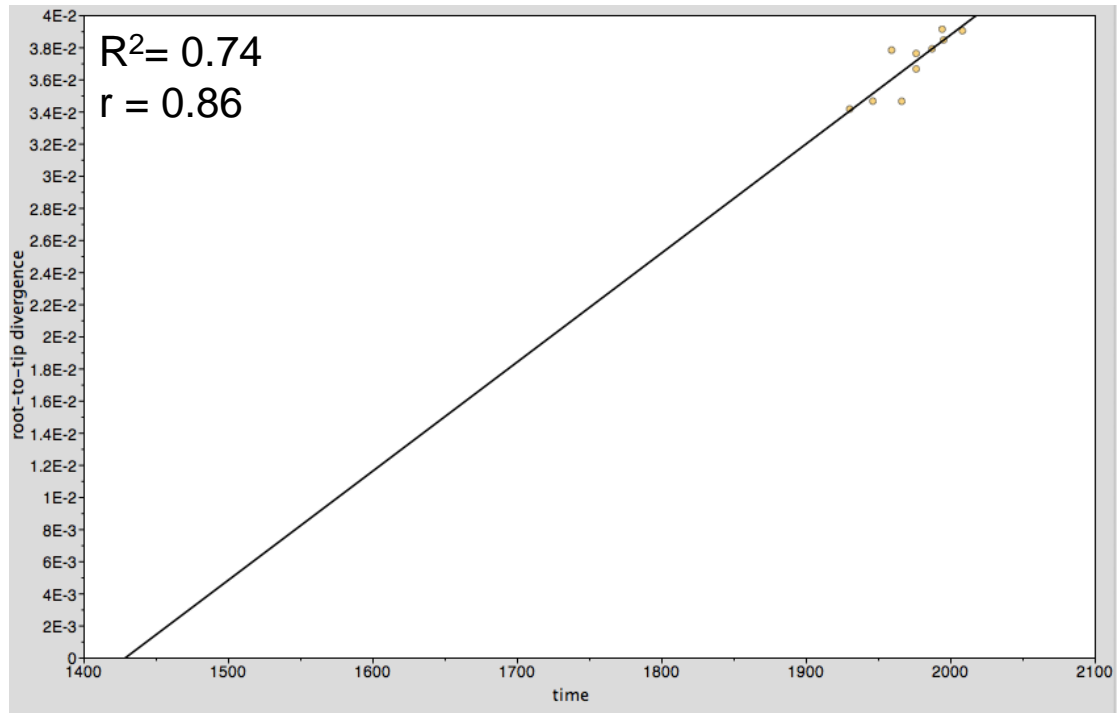

**Figure S1. Regression analysis of temporal resolution of ECTV sequence dataset.**

The plot represents linear regression of root-to-tip genetic distance within the ML phylogeny against sampling time for each taxa. Temporal resolution was assessed using the slope of the regression, with positive slope indicating sufficient temporal signal. Correlation coefficient “r” and “R2” are reported.

## Tables

**Table S1. Survival for Figure 1.**

| Isolate | pfu  |      |                 |                 |                 |                 |                 |
|---------|------|------|-----------------|-----------------|-----------------|-----------------|-----------------|
|         | 1    | 10   | 10 <sup>2</sup> | 10 <sup>3</sup> | 10 <sup>4</sup> | 10 <sup>5</sup> | 10 <sup>6</sup> |
| ECTV-M  | 0/5  | 0/5  | 0/5             |                 |                 |                 |                 |
| ECTV-I  |      |      |                 |                 | 5/5             | 5/5             | 4/5             |
| ECTV-MH |      |      |                 |                 | 5/5             | 5/5             | 5/5             |
| ECTV-HE |      |      |                 |                 | 5/5             | 5/5             | 5/5             |
| ECTV-H  | 3/10 | 6/10 | 4/10            | 4/5             |                 |                 |                 |
| ECTV-M1 | 5/10 | 2/10 | 0/5             | 0/5             |                 |                 |                 |
| ECTV-M4 | 5/5  | 4/5  | 5/5             | 7/10            | 0/5             | 0/5             |                 |
| ECTV-M5 | 5/5  | 4/5  | 4/10            | 1 /10           |                 |                 |                 |
| ECTV-MK | 5/5  | 3/10 | 2/10            | 0/5             |                 |                 |                 |

**Table S2. Survival of DBA/2 mice after s. c. infection in the footpad with ECTV isolates.**

| Isolate |      |     |     |     |                 |                 |
|---------|------|-----|-----|-----|-----------------|-----------------|
|         | 0.01 | 0.1 | 1   | 10  | 10 <sup>2</sup> | 10 <sup>3</sup> |
| ECTV-M  | 0/3  | 1/3 | 3/3 | 3/3 | 2/3             | 3/3             |
| ECTV-N  | 0/3  | 1/3 | 3/3 | 3/3 | 2/3             | 3/3             |
| ECTV-H  | 0/3  | 1/3 | 3/3 | 3/3 | 2/3             | 1/3             |
| ECTV-I  | 0/3  | 0/3 | 0/3 | 0/3 | 0/3             | 0/3             |

**Table S3. Comparative analysis of the proteins encoded by ECTV-Moscow, ECTV-Naval and the ECTVs from this study. Excel file.**
